# Supplementary material for: A Novel Non-Specific Lipid Transfer Protein Gene, CmnsLTP6.9, Enhanced Osmotic and Drought Tolerance by Regulating ROS Scavenging and Remodeling Lipid Profiles in Chinese Chestnut (Castanea mollissima Blume)
Source: MDPI journal article supplement (doi:10.3390/plants12223916), 2023-11-20
Supplement: s1 [file s1]

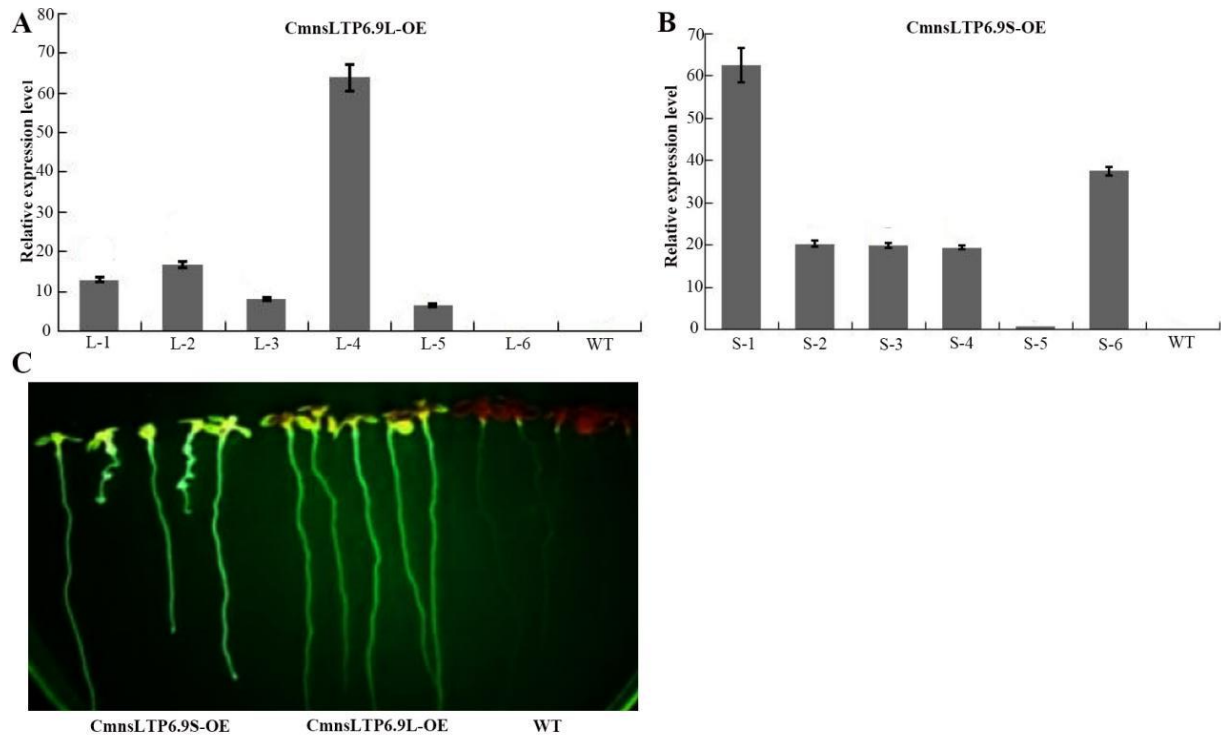

**Figure S2.** Positive detection of transgenic *Arabidopsis thaliana*. **A** CmnsLTP6.9L-OE lines by RT-PCR detection. **B** CmnsLTP6.9S-OE lines by RT-PCR detection. **C** OE lines by fluorescence detection.

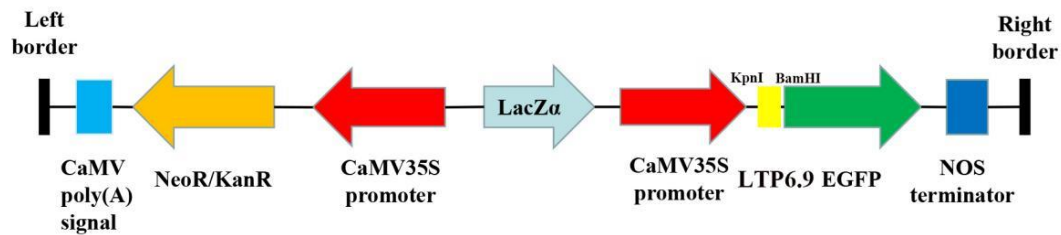

**Figure S3.** Representation of T-DNA region of the binary vector pCAMBIA2300-CmnsLTP6.9-EGFP used for genetic transformation.
